# Supplementary material for: Gender Differences In The Effects of Marital Status And Physical Activity On Depression Among The South Korean Elderly
Source: Research Square preprint supplement (doi:10.21203/rs.3.rs-960501/v1), 2021-10-18
Supplement: Supplementary file 1 [file 9dbe0440923fa968d191d162.docx]

**Additional table 1.** The association between marital status and physical activity with depression by sex.

| Variable | Depression | | | | | | | | |
| --- | --- | --- | --- | --- | --- | --- | --- | --- | --- |
| Total | | |  | Men | |  | Women | |
| OR | 95% CI |  | | OR | 95% CI |  | OR | 95% CI |
| Combination | | | | | | | | | |
| Spouse and PA☨ | 1.00 |  |  | | 1.00 |  |  | 1.00 |  |
| Spouse and No PA | 1.15 | 0.80-1.65 |  | | 1.34 | 0.75-2.40 |  | 0.99 | 0.62-1.57 |
| Spouseless and PA | 1.65 | 1.04-2.62 |  | | 2.65 | 1.03-6.80 |  | 1.35 | 0.79-2.32 |
| Spouseless and No PA | 1.56 | 1.05-2.31 |  | | 2.09 | 0.91-4.82 |  | 1.34 | 0.84-2.13 |

☨ PA = Physical activity; Adjusted for age, education, region, occupation, household income, current smoking, high-risk alcohol drinking, self-rated health, chronic disease
